# Supplementary figures and images for: Combination of Wnt/β-Catenin Targets S100A4 and DKK1 Improves Prognosis of Human Colorectal Cancer
Source: MDPI journal article supplement (doi:10.3390/cancers14010037), 2021-12-22

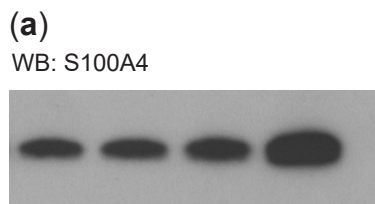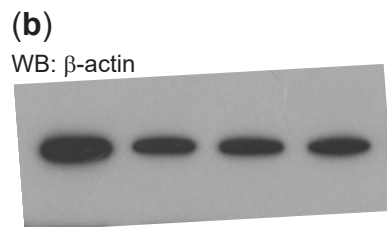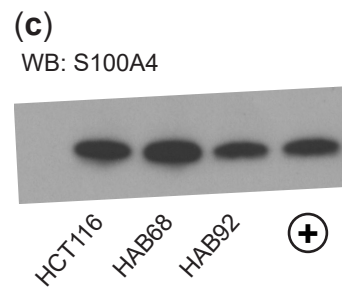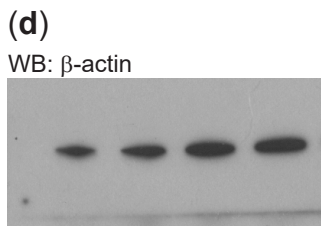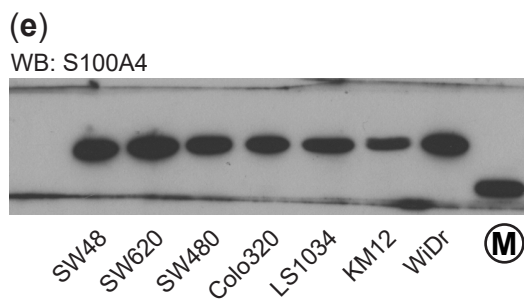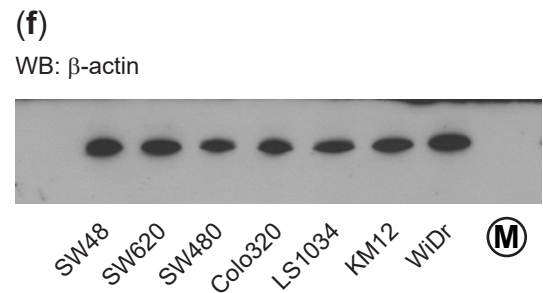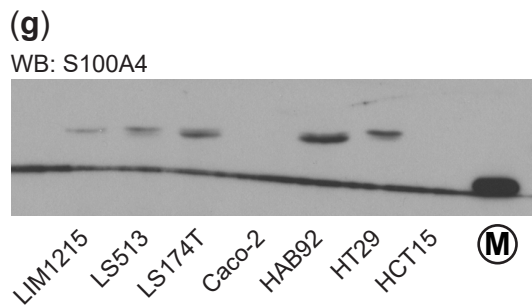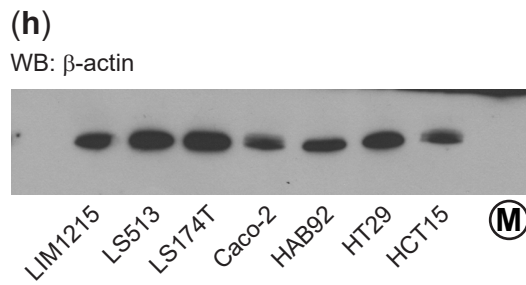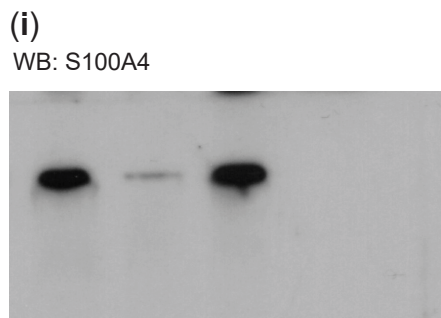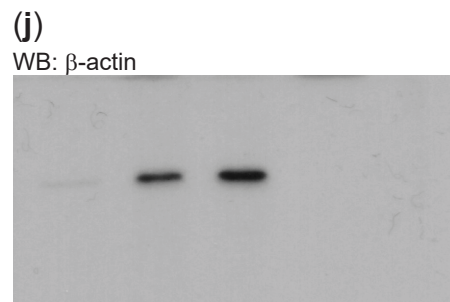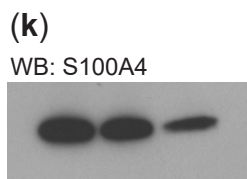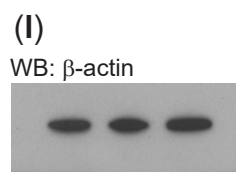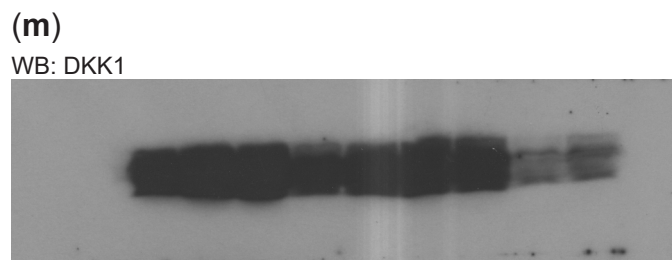

**(+)** – respective positive control

**(M)** – protein weight marker lane

Supplement: s1 [file s1]
